# Supplementary material for: Multimodal imaging of the dynamic brain tumor microenvironment during glioblastoma progression and in response to treatment
Source: PubMed Central journal article supplement — iScience. 2022 Jun 9;25(7):104570. doi: 10.1016/j.isci.2022.104570 (PMC9234718; doi:10.1016/j.isci.2022.104570), 2022-06-09
Supplement: mmc1.pdf [file mmc1.pdf]

**iScience, Volume 25**

**Supplemental information**

**Multimodal imaging of the dynamic brain  
tumor microenvironment during glioblastoma  
progression and in response to treatment**

**Anoek Zomer, Davide Croci, Joanna Kowal, Leon van Gorp, and Johanna A. Joyce**

## Supplemental Information

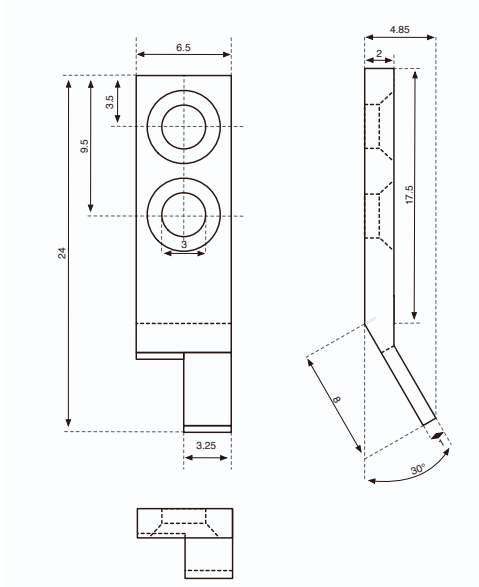

**Figure S1. Head-bar schematic, related to Figure 1.** Head bars were made from polyether ether ketone (PEEK) and were produced by 3D printing. Metric unit: mm.

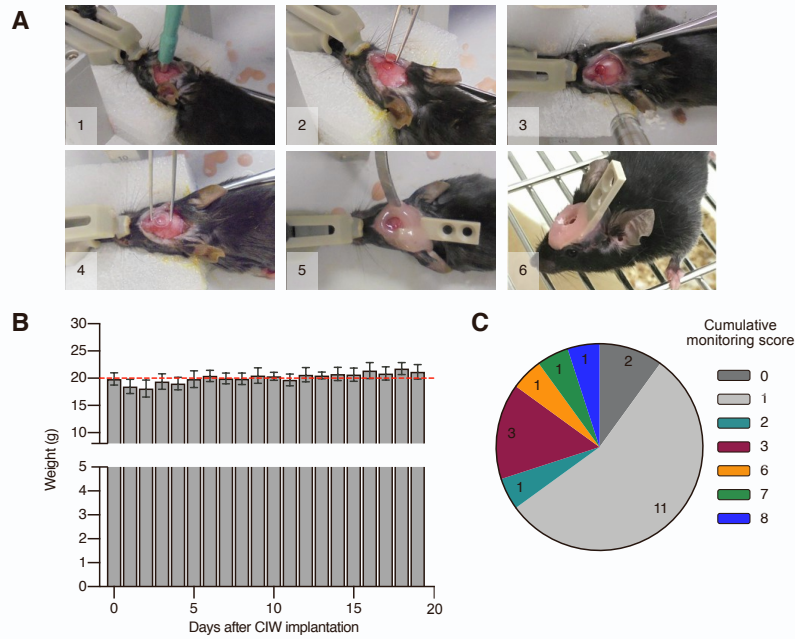

**Figure S2. Mice show a rapid and full recovery after CIW implantation, related to Figure 1.** (A) Fully anaesthetized mice were placed on a heated stereotactic frame. A 3 mm biopsy punch was used to remove a circular fragment of the skull (images 1 and 2). DF1 virus-producing cells were then injected with a high-precision Hamilton's syringe (image 3) to subsequently induce tumor formation over time. Afterwards, the skull was closed by applying the cranial imaging window, which was fixed with super-glue and dental cement. Simultaneously, a head-bar was placed (images 4 and 5) which allowed the stabilization of the mouse's head during subsequent two-photon microscopy experiments and avoided breathing-associated movements. The mouse was then returned to the cage and monitored while recovering from the surgery and anesthesia (image 6). (B) Monitoring of mouse weight following surgery (n=20 mice), showing a rapid recovery of body weight. The dashed red line shows the mean weight on the day of surgery. Data are represented as mean  $\pm$  SD. (C) Evaluation of the overall mouse welfare 2 days post-surgery (see STAR Methods for a detailed description of the monitoring scoring system). The numbers in each sector of the pie chart correspond to the number of mice in that particular category.

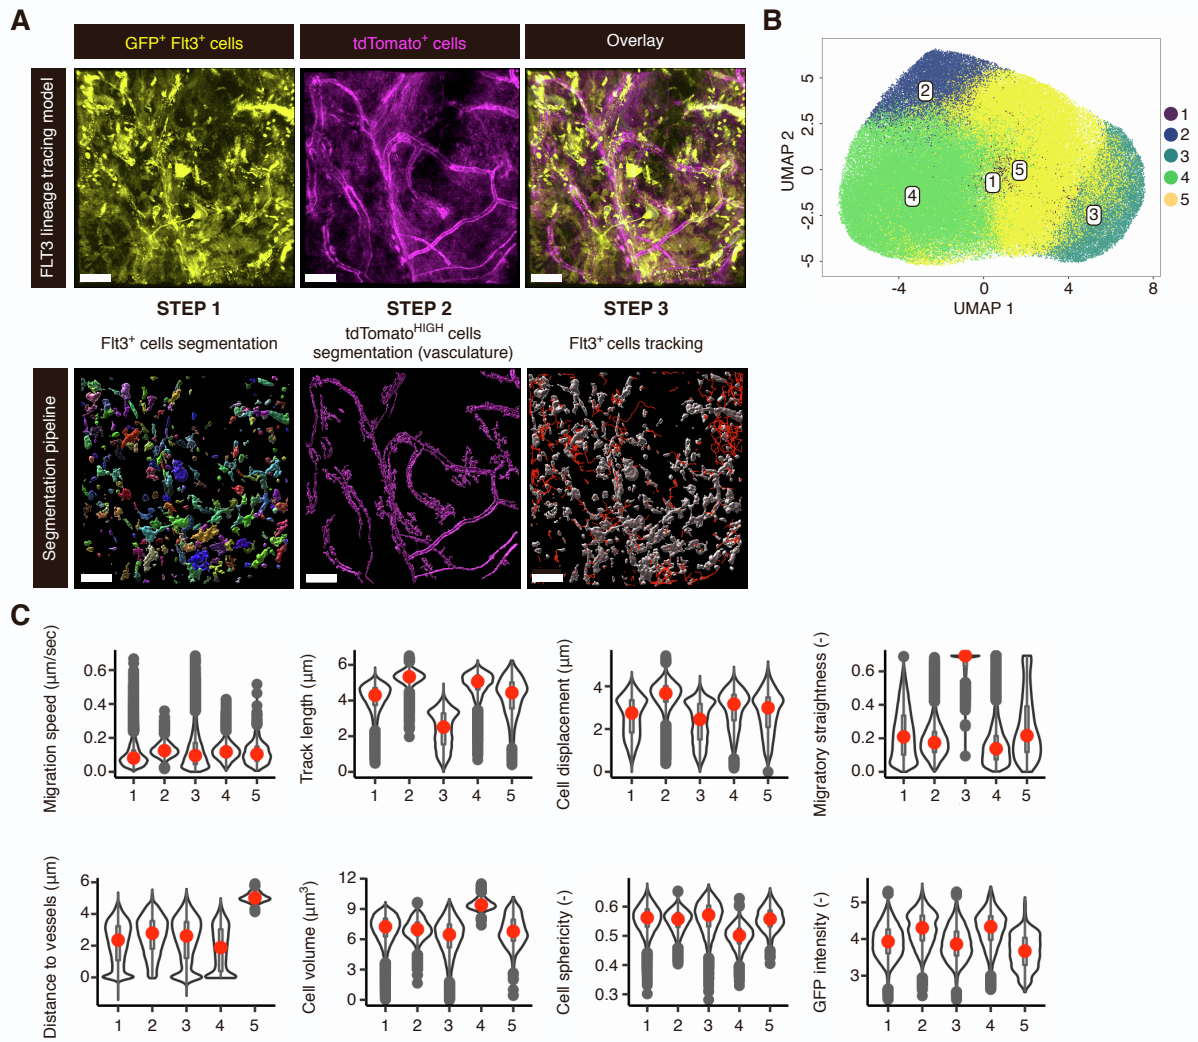

**Figure S3. Dimensionality reduction analysis reveals distinct cell clusters in the FLT3 lineage-tracing model, related to Figure 4.** (A) Segmentation and migration analysis of the FLT3 lineage-tracing model. GFP<sup>+</sup>Flt3<sup>+</sup> or tdTomato<sup>+</sup> cells (upper panel) were segmented in order to identify Flt3<sup>+</sup> peripheral immune cells (step 1) and highly tdTomato-expressing cells highlighted the vasculature (step 2). Flt3<sup>+</sup> cell migration was tracked as the final step (step 3). (B) UMAP visualization of Flt3<sup>+</sup> cell clusters. 93 time-lapses were analyzed, for a total of 135,100 Flt3<sup>+</sup> cells (*Ink4a/Arf*-deficient model n=9 mice, *p53*-deficient model n=5 mice). (C) Violin plots showing the different cell features in each of the clusters (the cluster numbers correspond to the IDs shown in (A)). The red dot on each violin plot represents the median. Y-axis are displayed as logarithmic scale.



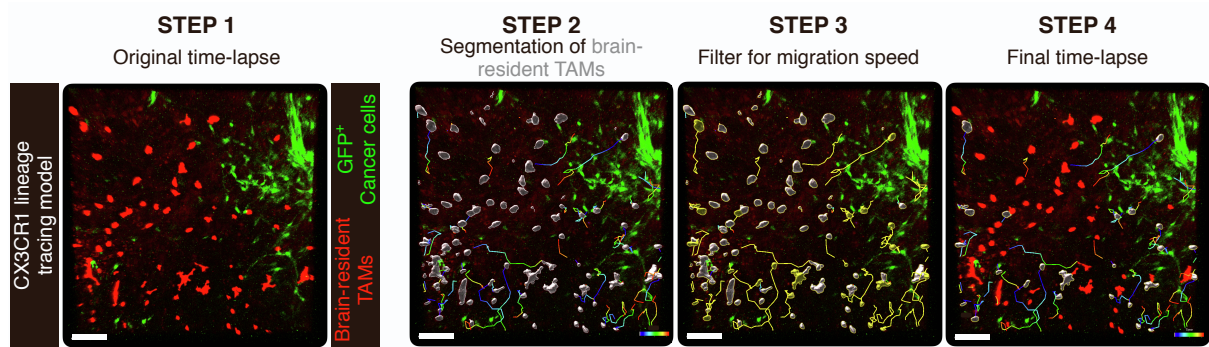

**Figure S4. Filtering of migrating brain-resident TAMs, related to Figure 4.** Cells were segmented and their movement was tracked over the entire course of the time-lapse (steps 1 and 2). Subsequently, cell speed was used to discriminate migratory cells from stationary cells (yellow lines, track speed  $\geq 0.05 \mu\text{m/s}$ , steps 3 and 4). Scale bars:  $100 \mu\text{m}$ . Color-coded tracks display time through the time-lapse (blue indicates the start, and red indicates the end of the imaging acquisition).

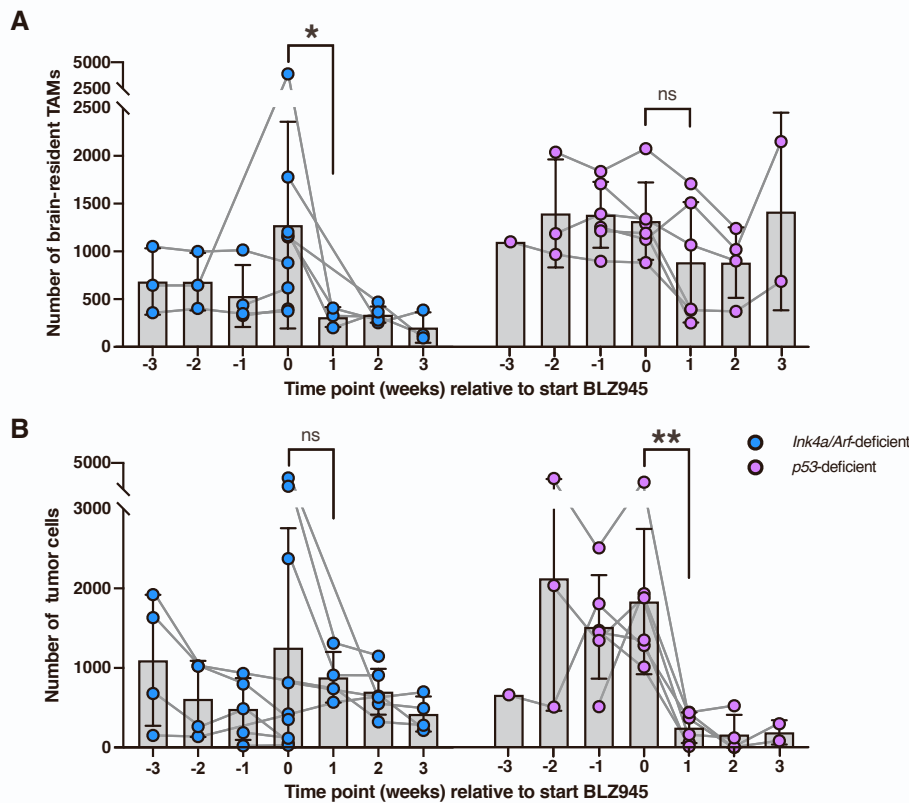

**Figure S5. Dynamics of brain-resident TAMs and tumor cells during glioblastoma progression and in response to BLZ945 treatment, related to Figure 4.** (A) Quantification of the number of brain-resident TAMs and (B) tumor cells, in both *Ink4a/Arf*-deficient and *p53*-deficient GBMs. Each dot represents the number of cells in one FOV (Student's t-test, ns: not significant, \* indicates  $P < 0.05$ , and \*\* indicates  $P < 0.01$ ). Data are represented as mean  $\pm$  SD.

**Table S1. List of antibodies used, related to Figure 2 and 3.**

| Antibodies        |         |                                        |                        |            |                 |          |                                                  |
|-------------------|---------|----------------------------------------|------------------------|------------|-----------------|----------|--------------------------------------------------|
| Target            | Species | Antibody                               | Manufacturer           | Clone      | Category number | Dilution | Application                                      |
| Ly-6C             | Rat     | Anti-mouse Ly-6C Brilliant Violet 711  | BioLegend              | HK1.4      | 128037          | 1:800    | Flow cytometry panel #1                          |
| Ly-6G             | Rat     | Anti-mouse Ly-6G Brilliant Violet 605  | BioLegend              | 1A8        | 127639          | 1:160    | Flow cytometry panel #1                          |
| CD11b             | Rat     | Anti-mouse CD11b BUV661                | BD Biosciences         | M1/70      | 612977          | 1:800    | Flow cytometry panel #1, Flow cytometry panel #2 |
| CD49d             | Rat     | Anti-mouse CD49d PE/Cy7                | BioLegend              | R1-2       | 103618          | 1:160    | Flow cytometry panel #1                          |
| CD45              | Rat     | Anti-mouse CD45 Alexa Fluor 700        | BioLegend              | 30-F11     | 103128          | 1:200    | Flow cytometry panel #1, Flow cytometry panel #2 |
| CD3               | Hamster | Anti-mouse CD3e BUV395                 | BD Biosciences         | 145-2C11   | 563565          | 1:75     | Flow cytometry panel #1 and #2                   |
| NK-1.1            | Mouse   | Anti-mouse NK-1.1 Brilliant Violet 421 | BioLegend              | PK136      | 108741          | 1:640    | Flow cytometry panel #1                          |
| CD19              | Rat     | Anti-mouse CD19 Brilliant Violet 605   | BioLegend              | 6D5        | 115539          | 1:320    | Flow cytometry panel #2                          |
| NK-1.1            | Mouse   | Anti-mouse NK-1.1 Brilliant Violet 711 | BioLegend              | PK136      | 108745          | 1:640    | Flow cytometry panel #2                          |
| Collagen I        | Rabbit  | Anti-mouse collagen I                  | Abcam                  | Polyclonal | ab34710         | 1:100    | Immunofluorescence panel #1                      |
| YFP               | Chicken | Anti-GFP (cross-reactive to YFP)       | Abcam                  | Polyclonal | ab13970         | 1:1000   | Immunofluorescence panel #1                      |
| Chicken IgG (H+L) | Donkey  | Anti-chicken IgG Alexa Fluor 488       | Jackson ImmunoResearch | Polyclonal | 703-545-155     | 1:500    | Immunofluorescence panel #1                      |
| Rabbit IgG (H+L)  | Donkey  | Anti-rabbit IgG Alexa Fluor 647        | Invitrogen             | Polyclonal | A31573          | 1:500    | Immunofluorescence panel #1                      |

Flow cytometry panels #1 and #2 have been used in experiments presented in Figure 2.

Immunofluorescence panel #1 has been used in experiments presented in Figure 3.
